# Supplementary material for: RAS/BRAF Circulating Tumor DNA Mutations as a Predictor of Response to First-Line Chemotherapy in Metastatic Colorectal Cancer Patients
Source: PubMed Central journal article supplement (PMC5863340; doi:10.1155/2018/4248971), 2018-03-07
Supplement: 4248971.f1.pdf [file 4248971.f1.pdf]

## Supplement materials

**Supplement table 1.** Patients underwent a radical surgery with measurable DFS

| Sample ID | Age | Gender | Primary tumor site | Perineural invasion | Vascular tumor thromboses | Histologic grade          | T stage | N stage | NCCN stage | Tissue KRAS | Tissue Mutation | Outcome | DFS (days) |
|-----------|-----|--------|--------------------|---------------------|---------------------------|---------------------------|---------|---------|------------|-------------|-----------------|---------|------------|
| CC045     | 55  | M      | Rectum             | Y                   | Y                         | moderately differentiated | T3      | N2      | IIIB       | N           | N               | PD      | 155        |
| CC062     | 68  | M      | Rectum             | Y                   | Y                         | poorly differentiated     | T3      | N2a     | IIIB       | Y           | Y               | PD      | 247        |
| CC063     | 66  | M      | Rectum             | Y                   | Y                         | moderately differentiated | T3      | N1b     | IIIB       | N           | N               | PD      | 51         |
| CC064     | 69  | M      | Rectum             | Y                   | N                         | moderately differentiated | T3      | N1b     | IIIB       | Y           | Y               | PD      | 92         |
| CC065     | 77  | M      | Rectum             | N                   | N                         | moderately differentiated | T3      | N1a     | IIIB       | N           | N               | PD      | 1837       |
| CC070     | 79  | F      | Rectum             | Y                   | Y                         | moderately differentiated | T3      | N1      | IIIB       | Y           | Y               | PD      | 60         |

---

|       |    |   |                  |    |    |                           |    |     |      |   |   |    |      |
|-------|----|---|------------------|----|----|---------------------------|----|-----|------|---|---|----|------|
| CC071 | 65 | F | Descending colon | N  | N  | NA                        | T2 | N2b | IIIA | N | N | PD | 106  |
| CC075 | 53 | F | Rectum           | N  | N  | moderately differentiated | TX | N1a | NA   | N | N | PD | 519  |
| CC076 | 66 | M | Descending colon | N  | N  | moderately differentiated | T3 | N1b | IIIB | N | N | PD | 417  |
| CC077 | 70 | M | colon            | Y  | N  | NA                        | T3 | N0  | IIA  | N | N | PD | 1100 |
| CC079 | 43 | M | Descending colon | N  | N  | moderately differentiated | T3 | N1b | IIIB | N | N | SD | 979  |
| CC081 | 71 | F | Descending colon | N  | N  | moderately differentiated | T3 | N0  | IIA  | N | N | PD | 322  |
| CC084 | 63 | M | colon            | N  | N  | moderately differentiated | T3 | N2  | IIIB | Y | Y | PD | 365  |
| CC086 | 68 | M | Rectum           | Y  | Y  | moderately differentiated | T3 | N1  | IIIB | Y | Y | PD | 648  |
| CC089 | 52 | M | Rectum           | NA | NA | poorly differentiated     | T3 | N2  | IIIB | N | N | PD | 637  |

---

|       |    |   |                 |    |    |                           |    |     |      |   |   |    |      |
|-------|----|---|-----------------|----|----|---------------------------|----|-----|------|---|---|----|------|
| CC091 | 67 | M | Rectum          | N  | N  | moderately differentiated | T2 | N2  | IIIB | Y | Y | PD | 203  |
| CC102 | 76 | M | Sigmoid colon   | NA | NA | moderately differentiated | T2 | N0  | I    | N | Y | PD | 1360 |
| CC106 | 61 | M | Rectum          | Y  | N  | moderately differentiated | T3 | N2a | IIIB | N | N | SD | 670  |
| CC111 | 50 | F | Sigmoid colon   | Y  | NA | moderately differentiated | T4 | N1  | IIIB | Y | Y | PD | 303  |
| SOP22 | 74 | M | Ascending colon | N  | N  | moderately differentiated | T3 | N2  | IIIB | Y | Y | PD | 578  |
| SOP25 | 52 | M | Rectum          | N  | Y  | moderately differentiated | T3 | N1  | IIIB | N | N | PD | 350  |
| SOP27 | 55 | M | Rectum          | N  | N  | moderately differentiated | T3 | N1  | IIIB | N | N | PD | 655  |
| SOP29 | 60 | M | Sigmoid colon   | N  | N  | moderately differentiated | T3 | N0  | IIA  | N | N | PD | 692  |
| SOP30 | 59 | F | Rectum          | N  | N  | NA                        | T2 | N1  | IIIA | N | N | SD | 2841 |

---

|       |    |   |                 |    |    |                           |    |     |      |   |   |    |      |
|-------|----|---|-----------------|----|----|---------------------------|----|-----|------|---|---|----|------|
| SOP41 | 61 | M | Rectum          | N  | Y  | moderately differentiated | T3 | N1b | IIIB | N | N | PD | 593  |
| SOP44 | 57 | M | Rectum          | N  | N  | moderately differentiated | T4 | N1  | IIIB | N | N | PD | 105  |
| SOP48 | 60 | M | Rectum          | N  | N  | NA                        | T3 | N1  | IIIB | N | N | PD | 65   |
| SOP49 | 74 | F | Sigmoid colon   | N  | N  | moderately differentiated | T3 | N1  | IIIB | N | N | PD | 729  |
| SOP5  | 52 | M | Rectum          | NA | NA | NA                        | T3 | N0  | IIA  | N | N | PD | 182  |
| SOP50 | 55 | M | Ascending colon | N  | N  | moderately differentiated | T3 | N2  | IIIB | N | N | PD | 73   |
| SOP51 | 71 | F | Rectum          | N  | Y  | moderately differentiated | T3 | N0  | IIA  | Y | Y | PD | 932  |
| SOP56 | 52 | F | Rectum          | N  | N  | well differentiated       | T4 | N1  | IIIB | Y | Y | PD | 1155 |
| SOP61 | 52 | M | Ascending colon | N  | N  | moderately differentiated | T3 | N0  | IIA  | Y | Y | PD | 700  |
| SOP62 | 76 | M | Sigmoid colon   | N  | Y  | NA                        | T4 | N2  | IIIC | N | N | PD | 247  |

---

---

|       |    |   |                  |   |   |                           |    |     |      |   |   |    |     |
|-------|----|---|------------------|---|---|---------------------------|----|-----|------|---|---|----|-----|
| SOP68 | 43 | F | Descending colon | N | N | moderately differentiated | TX | N1b | NA   | Y | Y | PD | 313 |
| SOP70 | 56 | M | Rectum           | Y | Y | moderately differentiated | T3 | N2  | IIIB | Y | Y | PD | 271 |
| SOP74 | 46 | M | Ascending colon  | Y | N | NA                        | T4 | N1  | IIIB | Y | Y | PD | 310 |
| SOP77 | 51 | M | Sigmoid colon    | N | N | moderately differentiated | T3 | N2  | IIIB | N | N | SD | 184 |
| SOP80 | 62 | F | Sigmoid colon    | N | N | poorly differentiated     | TX | N2b | NA   | Y | Y | PD | 854 |
| SOP89 | 61 | M | Descending colon | Y | N | moderately differentiated | T4 | N1a | IIIB | N | N | PD | 590 |

---

**Supplement table 2.** Patients treatment in subsequent first line chemotherapy with measurable PFS

| Sample ID | Age | Sex | Primary Tumor Site | Perineural Invasion | Vascular tumor Thrombus | Histologic Grade          | Number of metastatic site | T  | N   | NCCN stage | Plasma KRAS | Plasma Mutation | Outcome | PFS (days) |
|-----------|-----|-----|--------------------|---------------------|-------------------------|---------------------------|---------------------------|----|-----|------------|-------------|-----------------|---------|------------|
| CC052     | 59  | F   | Rectum             | N                   | N                       | well differentiated       | 2                         | T2 | NX  | IV         | Y           | Y               | PD      | 141        |
| CC062     | 68  | M   | Rectum             | Y                   | Y                       | poorly differentiated     | 1                         | T3 | N2a | IV         | Y           | Y               | SD      | 147        |
| CC064     | 69  | M   | Rectum             | Y                   | N                       | moderately differentiated | 2                         | T3 | N1b | IV         | Y           | Y               | PD      | 204        |
| CC065     | 77  | M   | Rectum             | N                   | N                       | moderately differentiated | 1                         | T3 | N1a | IV         | N           | N               | SD      | 126        |
| CC068     | 62  | M   | Rectum             | N                   | N                       | NA                        | 2                         | T2 | N1  | IV         | N           | N               | PD      | 302        |
| CC070     | 79  | F   | Rectum             | Y                   | Y                       | moderately differentiated | 1                         | T3 | N1  | IV         | N           | N               | PD      | 50         |

---

|       |    |   |                         |    |    |                              |   |    |     |    |   |   |    |      |
|-------|----|---|-------------------------|----|----|------------------------------|---|----|-----|----|---|---|----|------|
| CC071 | 65 | F | Descen<br>ding<br>colon | N  | N  | NA                           | 1 | T2 | N2b | IV | N | N | PD | 357  |
| CC074 | 80 | M | Transv<br>erse<br>colon | N  | N  | moderately<br>differentiated | 1 | T3 | N1b | IV | N | N | SD | 272  |
| CC077 | 70 | M | colon                   | Y  | N  | NA                           | 3 | T3 | N0  | IV | N | Y | PD | 49   |
| CC081 | 71 | F | Descen<br>ding<br>colon | N  | N  | moderately<br>differentiated | 2 | T3 | N0  | IV | N | N | SD | 1308 |
| CC084 | 63 | M | colon                   | N  | N  | moderately<br>differentiated | 1 | T3 | N2  | IV | Y | Y | PD | 44   |
| CC086 | 68 | M | Rectum                  | Y  | Y  | moderately<br>differentiated | 1 | T3 | N1  | IV | Y | Y | SD | 598  |
| CC091 | 67 | M | Rectum                  | N  | N  | moderately<br>differentiated | 2 | T2 | N2  | IV | Y | Y | PD | 350  |
| CC102 | 76 | M | Sigmoi<br>d colon       | NA | NA | moderately<br>differentiated | 2 | T2 | N0  | IV | N | N | PD | 443  |

---

---

|       |    |   |                 |   |   |                           |   |    |    |    |   |   |    |     |
|-------|----|---|-----------------|---|---|---------------------------|---|----|----|----|---|---|----|-----|
| CC108 | 57 | M | Rectum          | Y | Y | moderately differentiated | 2 | T4 | N2 | IV | N | N | SD | 609 |
| SOP22 | 74 | M | Ascending colon | N | N | moderately differentiated | 3 | T3 | N2 | IV | N | N | SD | 487 |
| SOP25 | 52 | M | Rectum          | N | Y | moderately differentiated | 2 | T3 | N1 | IV | N | N | PD | 281 |
| SOP27 | 55 | M | Rectum          | N | N | moderately differentiated | 2 | T3 | N1 | IV | N | N | SD | 518 |
| SOP29 | 60 | M | Sigmoid colon   | N | N | moderately differentiated | 2 | T3 | N0 | IV | N | N | PD | 111 |
| SOP44 | 57 | M | Rectum          | N | N | moderately differentiated | 3 | T4 | N1 | IV | N | N | PD | 264 |
| SOP49 | 74 | F | Sigmoid colon   | N | N | moderately differentiated | 3 | T3 | N1 | IV | N | N | SD | 270 |
| SOP51 | 71 | F | Rectum          | N | Y | moderately differentiated | 1 | T3 | N0 | IV | Y | Y | PD | 239 |

---



---

|       |    |   |                  |   |   |                           |   |    |     |    |   |   |    |     |
|-------|----|---|------------------|---|---|---------------------------|---|----|-----|----|---|---|----|-----|
| SOP56 | 52 | F | Rectum           | N | N | well differentiated       | 1 | T4 | N1  | IV | N | N | SD | 451 |
| SOP61 | 52 | M | Ascending colon  | N | N | moderately differentiated | 1 | T3 | N0  | IV | Y | Y | PD | 259 |
| SOP63 | 82 | F | Transverse colon | N | N | moderately differentiated | 3 | T4 | NX  | IV | Y | Y | PD | 44  |
| SOP70 | 56 | M | Rectum           | Y | Y | moderately differentiated | 2 | T3 | N2  | IV | Y | Y | SD | 158 |
| SOP89 | 61 | M | Descending colon | Y | N | moderately differentiated | 1 | T4 | N1a | IV | N | N | SD | 59  |

---
